# Supplementary material
Source: MDPI journal article supplement (https://www.mdpi.com/2077-0472/8/7/101)
Supplement: s1 [file s1]

## Sheet: 2014
Field	Row_Spacing	DAE	BBCH	Heigth	Biomass	OPS1	OPS2	US1
NF1	Narrow Row	43	51	0.25	1.407	8.76204	0.168	0.293667
NF1	Narrow Row	43	51	0.23	1.704	8.82574	0.152333	0.228667
NF1	Narrow Row	43	51	0.3	1.926	9.10721	0.126333	0.340667
NF1	Narrow Row	43	51	0.23	1.63	9.10721	0.14575	0.29125
NF1	Narrow Row	43	51	0.25	1.481	9.29859	0.13775	0.237
NF1	Narrow Row	43	51	0.28	2.074	9.30721	0.1642	0.2764
NF1	Narrow Row	43	51	0.32	1.926	9.54054	0.12875	0.307
NF1	Narrow Row	43	51	0.28	2.444	9.66525	0.147	0.2406
NF1	Narrow Row	43	51	0.28	2	9.77388	0.1322	0.2918
NF1	Narrow Row	43	51	0.3	2.148	9.77388	0.1325	0.277
NF1	Narrow Row	43	51	0.3	2.444	9.84054	0.125333	0.203667
NF1	Narrow Row	43	51	0.3	3.259	10.3072	0.14975	0.298667
NF1	Narrow Row	43	51	0.28	2.296	10.4405	0.1434	0.5286
NF1	Narrow Row	43	51	0.33	2.963	10.5405	0.144	0.2728
NF1	Narrow Row	43	51	0.3	2.815	10.5405	0.13225	0.27575
NF1	Narrow Row	43	51	0.3	1.852	10.6072	0.109667	0.212
NF1	Narrow Row	43	51	0.3	1.778	10.6739	0.109333	0.248333
NF1	Narrow Row	43	51	0.27	1.704	10.8739	0.138	0.304333
NF1	Narrow Row	43	51	0.29	2.074	11.1319	0.177	0.231333
NF1	Narrow Row	43	51	0.35	3.852	11.2072	0.155333	0.374333
NF1	Narrow Row	43	51	0.32	3.037	11.3551	0.152	0.292167
NF1	Narrow Row	43	51	0.35	3.778	11.6072	0.14675	0.29
NF1	Narrow Row	43	51	0.32	4.074	11.6072	0.16875	0.3185
NF1	Narrow Row	43	51	0.31	3.778	11.7072	0.15225	0.32675
NF1	Narrow Row	43	51	0.34	4	12.4653	0.1755	0.288
NF1	Narrow Row	43	51	0.33	3.556	12.5986	0.194	0.293167
NF1	Narrow Row	43	51	0.34	4.148	12.8653	0.17	0.325333
NF1	Narrow Row	43	51	0.34	4.074	13.2319	0.18325	0.29425
NF1	Narrow Row	43	51	0.39	5.407	13.5319	0.1872	0.2835
NF1	Narrow Row	43	51	0.38	4.667	13.5986	0.18725	0.299333
NF1	Narrow Row	56	61	0.43	5.852	17.8565	0.19	0.38
NF1	Narrow Row	56	61	0.45	5.926	18.8437	0.2255	0.475
NF1	Narrow Row	56	61	0.45	5.778	18.9385	0.2054	0.4125
NF1	Narrow Row	56	61	0.38	4.519	18.9719	0.2355	0.37025
NF1	Narrow Row	56	61	0.38	5.259	19.1232	0.22	0.425
NF1	Narrow Row	56	61	0.43	5.852	19.1565	0.246667	0.4374
NF1	Narrow Row	56	61	0.42	4.444	19.3565	0.223	0.304333
NF1	Narrow Row	56	61	0.48	7.407	19.4232	0.265333	0.434167
NF1	Narrow Row	56	61	0.43	7.63	20.4232	0.235	0.441167
NF1	Narrow Row	56	61	0.47	9.704	20.6232	0.266	0.5008
NF1	Narrow Row	56	61	0.46	7.333	20.6899	0.23875	0.466667
NF1	Narrow Row	56	61	0.44	7.926	20.8565	0.249333	0.49725
NF1	Narrow Row	56	61	0.46	7.259	20.9385	0.230667	0.468
NF1	Narrow Row	56	61	0.48	5.778	21.0565	0.22775	0.46225
NF1	Narrow Row	56	61	0.49	8.889	21.1899	0.242333	0.441333
NF1	Narrow Row	56	61	0.55	9.852	21.3232	0.257667	0.508833
NF1	Narrow Row	56	61	0.46	9.333	21.3899	0.2556	0.4888
NF1	Narrow Row	56	61	0.48	7.333	21.4232	0.236	0.438667
NF1	Narrow Row	56	61	0.57	10.37	21.7052	0.242333	0.34275
NF1	Narrow Row	56	61	0.45	6.741	21.7597	0.234333	0.453
NF1	Narrow Row	56	61	0.55	9.63	21.7899	0.2644	0.51675
NF1	Narrow Row	56	61	0.51	8.667	21.8565	0.23875	0.45775
NF1	Narrow Row	56	61	0.57	8.889	22.0052	0.252	0.475
NF1	Narrow Row	56	61	0.53	9.407	22.0385	0.256	0.47425
NF1	Narrow Row	56	61	0.48	7.778	22.1899	0.233	0.54975
NF1	Narrow Row	56	61	0.57	10.667	22.3719	0.26025	0.486667
NF1	Narrow Row	56	61	0.56	11.333	22.7385
NF1	Narrow Row	56	61	0.59	11.556	22.8385	0.2575	0.434
NF1	Narrow Row	56	61	0.53	9.63	22.8719	0.2655	0.424
NF1	Narrow Row	56	61	0.56	10.444	23.1052	0.2805	0.52975
NF1	Narrow Row	77	71	0.6	9.63	23.5181	0.3485	0.7465
NF1	Narrow Row	77	71	0.67	12.889	24.2181	0.3675	0.82275
NF1	Narrow Row	77	71	0.71	12.593	24.7181	0.32775	0.759
NF1	Narrow Row	77	71	0.74	16.296	25.5431	0.348	0.80375
NF1	Narrow Row	77	71	0.69	11.852	25.7628	0.3615	0.77475
NF1	Narrow Row	77	71	0.69	13.111	25.8515	0.362	0.863
NF1	Narrow Row	77	71	0.71	14.963	26.1628	0.333333	0.791667
NF1	Narrow Row	77	71	0.74	12.074	27.1295	0.359	0.794333
NF1	Narrow Row	77	71	0.72	12.222	27.3181	0.3395	0.791
NF1	Narrow Row	77	71	0.75	14.37	27.7515	0.36275	0.774
NF1	Narrow Row	77	71	0.79	17.111	27.8295	0.34125	0.6715
NF1	Narrow Row	77	71	0.85	17.037	27.9295	0.357333	0.760667
NF1	Narrow Row	77	71	0.79	15.556	27.9628	0.35	0.774667
NF1	Narrow Row	77	71	0.76	17.259	28.0128	0.3455	0.7135
NF1	Narrow Row	77	71	0.76	14.222	28.1515	0.3565	0.77425
NF1	Narrow Row	77	71	0.73	13.037	28.2515	0.364333	0.784
NF1	Narrow Row	77	71	0.81	17.778	28.3628	0.35425	0.823
NF1	Narrow Row	77	71	0.76	13.778	28.8181	0.36475	0.842
NF1	Narrow Row	77	71	0.83	17.185	28.9128	0.3406	0.7242
NF1	Narrow Row	77	71	0.75	16	28.9431	0.359667	0.778333
NF1	Narrow Row	77	71	0.89	21.852	29.0628	0.36075	0.82075
NF1	Narrow Row	77	71	0.92	22.815	29.0628	0.3555	0.79125
NF1	Narrow Row	77	71	0.8	14.074	29.1431	0.36625	0.91425
NF1	Narrow Row	77	71	0.85	22.074	29.1628	0.36175	0.76825
NF1	Narrow Row	77	71	0.77	18.667	29.3181	0.3585	0.86325
NF1	Narrow Row	77	71	0.84	21.333	29.3848	0.36	0.92
NF1	Narrow Row	77	71	0.92	23.704	29.3962	0.3515	0.6865
NF1	Narrow Row	77	71	0.95	23.333	29.6628	0.3645	0.82075
NF1	Narrow Row	77	71	0.83	16.593	29.8181	0.3582	0.7952
NF1	Narrow Row	77	71	0.91	25.185	30.5628	0.3585	0.78125
NF1	Narrow Row	111	81	0.86	21.111	21.6103	0.325	0.7995
NF1	Narrow Row	111	81	0.85	24	21.7664	0.3175	0.810667
NF1	Narrow Row	111	81	0.85	24.37	22.0998	0.32375	0.835167
NF1	Narrow Row	111	81	0.85	18.667	22.3081	0.320833	0.815333
NF1	Narrow Row	111	81	0.82	25.333	22.6998	0.321333	0.8082
NF1	Narrow Row	111	81	0.82	24.074	23.3998	0.32675	0.7774
NF1	Narrow Row	111	81	0.88	24	24.2998	0.336667
NF1	Narrow Row	111	81	0.83	25.63	24.6103	0.344333	0.80375
NF1	Narrow Row	111	81	0.93	24.37	24.7331	0.33575	0.806
NF1	Narrow Row	111	81	0.87	31.333	24.8664	0.328667	0.7392
NF1	Narrow Row	111	81	0.88	23.407	25.0331	0.348	0.8956
NF1	Narrow Row	111	81	0.85	27.259	25.5103	0.3205	0.780833
NF1	Narrow Row	111	81	0.86	24.963	25.5664	0.344	0.79575
NF1	Narrow Row	111	81	0.93	30.222	25.6769	0.3625
NF1	Narrow Row	111	81	0.94	24.667	25.8436	0.353667
NF1	Narrow Row	111	81	0.95	34.074	25.9103	0.362
NF1	Narrow Row	111	81	0.92	23.407	26.2664	0.3285	0.883
NF1	Narrow Row	111	81	0.9	26	26.2769	0.366667	0.96725
NF1	Narrow Row	111	81	0.89	29.111	26.7769	0.36125
NF1	Narrow Row	111	81	0.95	31.333	26.9331	0.356
NF1	Narrow Row	111	81	0.9	28.296	26.9436	0.354
NF1	Narrow Row	111	81	1.01	26.37	27.1998	0.348667
NF1	Narrow Row	111	81	0.96	27.778	27.4103	0.332	0.877667
NF1	Narrow Row	111	81	0.95	26	27.7436	0.3615	0.88
NF1	Narrow Row	111	81	0.97	27.481	29.1103	0.35975	0.911667
NF1	Narrow Row	111	81	0.92	24.296	29.3664	0.358667	0.93
NF1	Narrow Row	111	81	0.98	28.963	30.2998	0.33925	0.839
NF1	Narrow Row	111	81	0.96	30.963	30.5769	0.36325	0.8638
NF1	Narrow Row	111	81	0.96	28.741	30.8269	0.356833	0.8385
NF1	Narrow Row	111	81	0.97	27.407	31.2436	0.34825	0.8545
NF1	Narrow Row	171	95	0.75	13.556	4.97617	0.122
NF1	Narrow Row	171	95	0.78	14.074	5.60951	0.120333
NF1	Narrow Row	171	95	0.8	16.889	6.10951	0.1195
NF1	Narrow Row	171	95	0.72	12.296	6.19319	0.0986667
NF1	Narrow Row	171	95	0.76	11.704	6.27617	0.136333
NF1	Narrow Row	171	95	0.82	14.074	6.39319	0.112333
NF1	Narrow Row	171	95	0.82	10.741	6.50951	0.115
NF1	Narrow Row	171	95	0.86	14.963	6.59284	0.130333
NF1	Narrow Row	171	95	0.82	14.593	6.59319	0.137
NF1	Narrow Row	171	95	0.84	16.444	6.62653	0.125
NF1	Narrow Row	171	95	0.8	11.111	6.64284	0.122667
NF1	Narrow Row	171	95	0.89	21.407	6.70951	0.111667
NF1	Narrow Row	171	95	0.82	14.815	7.30951	0.129
NF1	Narrow Row	171	95	0.89	22.593	7.37617	0.128667
NF1	Narrow Row	171	95	0.88	16.074	7.69319	0.137
NF1	Narrow Row	171	95	0.91	21.926	7.74284	0.119
NF1	Narrow Row	171	95	0.86	19.407	7.79284	0.141
NF1	Narrow Row	171	95	0.88	22.815	8.25986	0.186
NF1	Narrow Row	171	95	0.98	21.63	8.54284	0.128333
NF1	Narrow Row	171	95	0.89	17.481	8.80951	0.124
NF1	Narrow Row	171	95	0.94	28.444	9.09319	0.143
NF1	Narrow Row	171	95	0.95	18.963	9.34284	0.127333
NF1	Narrow Row	171	95	0.92	23.111	10.4265	0.145667
NF1	Narrow Row	171	95	0.96	26.148	10.5762	0.136
NF1	Narrow Row	171	95	0.96	26.148	10.5765	0.14
NF1	Narrow Row	171	95	1	33.778	10.9265	0.142667
NF1	Narrow Row	171	95	0.92	24.519	11.0428	0.171667
NF1	Narrow Row	171	95	0.96	26.667	11.4428	0.171667
NF1	Narrow Row	171	95	0.92	26.593	11.4428	0.17
NF1	Narrow Row	171	95	0.9	21.111	11.9095	0.175667
CF1	Conventional	38	51	0.3	1.583	-0.26714	0.104333
CF1	Conventional	38	51	0.25	1	0.530489	0.0953333
CF1	Conventional	38	51	0.32	1.792	2.17223	0.148187	0.312222
CF1	Conventional	38	51	0.3	1.583	2.64834	0.12625
CF1	Conventional	38	51	0.33	1.833	2.75858	0.1575
CF1	Conventional	38	51	0.34	2.75	3.1781	0.133667
CF1	Conventional	38	51	0.35	2.667	3.59716	0.137667	0.307
CF1	Conventional	38	51	0.3	2.5	3.73286	0.151667
CF1	Conventional	38	51	0.3	1.333	3.79893	0.134
CF1	Conventional	38	51	0.35	2.167	4.05858		0.28175
CF1	Conventional	38	51	0.34	2.125	4.27858		0.324
CF1	Conventional	38	51	0.32	2.417	4.31665		0.350813
CF1	Conventional	38	51	0.33	2.667	4.33286	0.158
CF1	Conventional	38	51	0.37	2.333	4.56619		0.257
CF1	Conventional	38	51	0.33	2.667	4.86619	0.152333
CF1	Conventional	38	51	0.42	3.333	6.57216		0.203667
CF1	Conventional	38	51	0.37	2.083	6.57453		0.353333
CF1	Conventional	38	51	0.4	3.917	7.03286		0.3575
CF1	Conventional	38	51	0.43	3.792	7.89716		0.464
CF1	Conventional	38	51	0.4	3.375	7.94953	0.176	0.316333
CF1	Conventional	38	51	0.45	3.917	8.53569		0.226
CF1	Conventional	38	51	0.43	3.333	8.69716		0.358
CF1	Conventional	38	51	0.36	2.667	8.73049		0.385333
CF1	Conventional	38	51	0.4	2.333	8.76619		0.361667
CF1	Conventional	38	51	0.38	2.75	8.99953		0.345
CF1	Conventional	38	51	0.43	3.458	9.14775		0.383167
CF1	Conventional	38	51	0.43	3.417	9.34716		0.385667
CF1	Conventional	38	51	0.47	3.75	10.3305		0.363
CF1	Conventional	38	51	0.47	4	11.6233		0.3426
CF1	Conventional	38	51	0.47	4	12.3995		0.299333
CF1	Conventional	56	61	0.36	1.958	6.11595	0.175333	0.52975
CF1	Conventional	56	61	0.3	1.667	6.59929	0.13075	0.481286
CF1	Conventional	56	61	0.33	1.75	8.61595	0.16375	0.4745
CF1	Conventional	56	61	0.39	3.208	8.94929	0.162667	0.44675
CF1	Conventional	56	61	0.47	3.458	9.97719	0.174	0.657
CF1	Conventional	56	61	0.37	2.833	10.716	0.1895	0.63575
CF1	Conventional	56	61	0.45	4.792	12.4826	0.172333	0.51475
CF1	Conventional	56	61	0.45	5.5	12.8439	0.210667	0.593
CF1	Conventional	56	61	0.48	4.458	13.8105	0.161	0.596
CF1	Conventional	56	61	0.51	5.125	13.8772	0.1875	0.632
CF1	Conventional	56	61	0.49	4.875	14.316	0.210667	0.7315
CF1	Conventional	56	61	0.5	5.292	15.716	0.174333	0.648
CF1	Conventional	56	61	0.6	8.125	16.3439	0.2212	0.648667
CF1	Conventional	56	61	0.56	6.167	16.5493	0.17775	0.6145
CF1	Conventional	56	61	0.53	7.667	16.9493	0.23825	0.7192
CF1	Conventional	56	61	0.57	7.583	16.9772	0.2265	0.8
CF1	Conventional	56	61	0.53	7.917	17.3439	0.212333	0.755
CF1	Conventional	56	61	0.55	8.875	19.0439	0.23	0.6885
CF1	Conventional	56	61	0.61	10.583	20.3646	0.187333	0.611
CF1	Conventional	56	61	0.63	9.583	20.5646	0.23	0.90375
CF1	Conventional	56	61	0.6	9.792	20.6439	0.226	0.7665
CF1	Conventional	56	61	0.67	9.208	21.0826	0.180667
CF1	Conventional	56	61	0.65	9.958	21.1896	0.243	0.8555
CF1	Conventional	56	61	0.64	10.292	21.4493	0.2374
CF1	Conventional	56	61	0.66	12.5	23.5493	0.1975	0.808
CF1	Conventional	56	61	0.7	11.958	23.5702	0.203714
CF1	Conventional	56	61	0.68	11.375	24.0493	0.2465	0.869167
CF1	Conventional	56	61	0.7	14.708	24.416	0.264333	0.9165
CF1	Conventional	56	61	0.7	11.917	24.8493	0.22725	0.912667
CF1	Conventional	56	61	0.72	14.625	25.3396	0.2338
CF1	Conventional	90	71	0.53	4.292	19.0144	0.265	0.74975
CF1	Conventional	90	71	0.58	6.708	20.9097	0.281125	0.6955
CF1	Conventional	90	71	0.62	6.167	21.9755	0.237	0.56025
CF1	Conventional	90	71	0.54	8.333	22.1986	0.2482	0.6746
CF1	Conventional	90	71	0.55	7.083	23.4144	0.2785	0.63375
CF1	Conventional	90	71	0.57	6.792	23.7394	0.271	0.63
CF1	Conventional	90	71	0.98	20	27.3344	0.3505	0.9215
CF1	Conventional	90	71	0.88	22.083	27.9617	0.3335	0.9355
CF1	Conventional	90	71	0.89	15.25	28.0394	0.332	0.8295
CF1	Conventional	90	71	0.92	21.375	28.3367	0.3336	0.9738
CF1	Conventional	90	71	1	20	28.6367	0.319	1.169
CF1	Conventional	90	71	0.99	22.292	28.9367	0.331	0.979333
CF1	Conventional	90	71	0.98	19.25	28.981	0.35225	1.03075
CF1	Conventional	90	71	0.97	18.958	29.0144	0.33425	0.89425
CF1	Conventional	90	71	1.02	20.208	30.3034	0.326667	0.999333
CF1	Conventional	90	71	1.2	24.667	31.1367	0.33375	1.2055
CF1	Conventional	90	71	0.95	21.25	31.3367	0.354	1.046
CF1	Conventional	90	71	1.07	30.5	31.6144	0.3605	1.13625
CF1	Conventional	90	71	0.97	21.25	31.67	0.348333	0.968333
CF1	Conventional	90	71	1.08	30	31.7144	0.351333	1.007
CF1	Conventional	90	71	1.05	30.542	32.1117	0.354333	0.979667
CF1	Conventional	90	71	1.1	28.75	32.4894	0.3555	1.096
CF1	Conventional	90	71	1.15	22.917	32.5367	0.36225	1.15425
CF1	Conventional	90	71	1.19	32.917	32.5367	0.35475	1.07575
CF1	Conventional	90	71	1.06	28.958	32.8034	0.352	1.1205
CF1	Conventional	90	71	1.02	27.25	32.9144	0.3635	0.9985
CF1	Conventional	90	71	1.2	33.125	33.4117	0.35525	1.12475
CF1	Conventional	90	71	1.21	30.417	33.4617	0.353	1.1925
CF1	Conventional	90	71	1.23	32.917	33.9144	0.366	1.035
CF1	Conventional	90	71	1.22	32.292	34.4034	0.3445	1.201
CF1	Conventional	127	81	0.94	28.042	21.2885	0.308667	0.98225
CF1	Conventional	127	81	0.98	38.542	22.1885	0.327	1.13233
CF1	Conventional	127	81	1.17	29.375	23.3552	0.3085	1.43833
CF1	Conventional	127	81	1.1	38.625	23.6885	0.317	1.1395
CF1	Conventional	127	81	0.96	29.667	23.9039	0.29525	0.73475
CF1	Conventional	127	81	0.99	33.333	23.9706	0.309	1.13867
CF1	Conventional	127	81	0.96	23	24.2039	0.31875	0.82525
CF1	Conventional	127	81	1.21	40	24.5302	0.3125	1.18067
CF1	Conventional	127	81	1.11	35.208	25.0885	0.3275	1.15875
CF1	Conventional	127	81	1.12	32.833	25.2802	0.34825	1.08625
CF1	Conventional	127	81	1.22	34.958	25.4007	0.316667	1.37125
CF1	Conventional	127	81	0.98	24.542	25.4122	0.296	0.9595
CF1	Conventional	127	81	1.42	41.417	25.5552	0.3185	1.461
CF1	Conventional	127	81	1.12	30.792	25.9706	0.316	1.1655
CF1	Conventional	127	81	1.16	38.292	26.2039	0.31375	1.399
CF1	Conventional	127	81	1.18	42.375	26.4552	0.3435	1.24775
CF1	Conventional	127	81	1.28	41.125	26.5372	0.323	1.178
CF1	Conventional	127	81	1.19	42.25	26.5622	0.3185	1.133
CF1	Conventional	127	81	1	27.625	27.6372	0.33075	1.00775
CF1	Conventional	127	81	1.23	39.917	27.7218	0.334667	1.35175
CF1	Conventional	127	81	1.3	43.042	27.7552	0.331	1.257
CF1	Conventional	127	81	1.45	43.625	27.9552	0.328	1.34125
CF1	Conventional	127	81	1.2	36.833	28.2622	0.332	1.22533
CF1	Conventional	127	81	1.25	37.625	28.3372	0.32	1.30967
CF1	Conventional	127	81	1.28	32.917	28.4622	0.33025	1.28525
CF1	Conventional	127	81	1.15	34.875	28.8622	0.342	1.234
CF1	Conventional	127	81	1.32	46.333	29.2052	0.329333	1.5095
CF1	Conventional	127	81	0.98	31	29.9885	0.346	0.942
CF1	Conventional	127	81	1.34	41.667	30.0052	0.351667	1.21175
CF1	Conventional	127	81	1.35	42.542	31.1039	0.331667	1.14225
CF1	Conventional	185	95	1	15.75	7.08038	0.1256
CF1	Conventional	185	95	1.2	23.958	8.58061	0.1655
CF1	Conventional	185	95	1.1	21.958	9.04728	0.1465
CF1	Conventional	185	95	1.18	18.292	9.44728	0.121333
CF1	Conventional	185	95	1.22	22.625	9.58879	0.153
CF1	Conventional	185	95	0.85	9.75	9.99697	0.129667
CF1	Conventional	185	95	1.13	19.167	10.1306	0.173667
CF1	Conventional	185	95	1.16	26.292	10.1473	0.156333
CF1	Conventional	185	95	1.14	17.5	10.2473	0.184
CF1	Conventional	185	95	1.05	14.417	10.3136	0.139667
CF1	Conventional	185	95	1.22	28.208	10.5306	0.175667
CF1	Conventional	185	95	0.99	14.167	10.547	0.213667
CF1	Conventional	185	95	1.15	29.583	10.5806	0.140333
CF1	Conventional	185	95	1.2	22.5	10.7138	0.201
CF1	Conventional	185	95	1.22	24.667	11.0388	0.16525
CF1	Conventional	185	95	1.14	23	11.1306	0.208
CF1	Conventional	185	95	1.3	25.375	11.647	0.18
CF1	Conventional	185	95	1.17	21.542	11.6888	0.139667
CF1	Conventional	185	95	1.18	26.958	11.7803	0.173
CF1	Conventional	185	95	1.15	22.958	11.9139	0.1375
CF1	Conventional	185	95	1.23	23.417	13.147	0.165667
CF1	Conventional	185	95	1.09	21.458	15.2139	0.219
CF1	Conventional	185	95	1.38	27.292	15.4473	0.261667
CF1	Conventional	185	95	1.4	33.5	16.5554	0.208
CF1	Conventional	185	95	1.5	33.875	16.9554	0.25
CF1	Conventional	185	95	1.55	43.833	16.972	0.2825
CF1	Conventional	185	95	1.28	32.208	17.047	0.208667
CF1	Conventional	185	95	1.4	25.5	18.8806	0.1685
CF1	Conventional	185	95	1.36	33.125	20.897	0.2395
CF1	Conventional	185	95	1.46	42.208	24.6272	0.25575

## Sheet: 2015
Field	Row_Spacing	DAE	Heigth	H_Five	HNR	Fresh_B	Dry_B	OPS1	OPS2	US2
CF2	Conventional	84	0.92	0.32	4.84211	18.8596	4.25247	34.2683	0.299819	1.0345
CF2	Conventional	84	0.9	0.3	4.5	18.2456	4.35194	33.4033	0.289074	0.950589
CF2	Conventional	84	0.96	0.31	4.8	19.4298	4.25513	34.2577	0.308745	1.07838
CF2	Conventional	84	0.91	0.29	5.05556	17.9825	4.53518	34.0711	0.301805	1.04993
CF2	Conventional	84	0.88	0.27	4.4	20.2193	3.93144	34.7833	0.312465	1.08263
CF2	Conventional	84	1.02	0.32	6	16.3596	3.6554	34.7562	0.309119	1.09541
CF2	Conventional	84	0.99	0.29	5.21053	17.2149	3.42095	34.669	0.309258	1.07998
CF2	Conventional	84	0.84	0.28	4.94118	15.9649	6.01686	34.2241	0.301925	1.00617
CF2	Conventional	84	1.01	0.22	5.61111	20.614	4.0236	34.3731	0.307666	1.04418
CF2	Conventional	84	0.95	0.29	5.27778	20.307	4.49516	33.04	0.290079	0.938379
CF2	Conventional	84	0.96	0.29	5.05263	18.0044	3.74779	34.2149	0.302168	0.996724
CF2	Conventional	84	1.01	0.32	5.94118	20.9649	4.31709	33.7215	0.299791	1.01195
CF2	Conventional	84	1	0.34	6.25	18.5526	4.38005	33.4284	0.298366	1.00432
CF2	Conventional	84	0.95	0.35	5.27778	18.3553	3.56679	34.9106	0.310917	1.07298
CF2	Conventional	84	1.04	0.33	6.93333	19.8026	3.29357	34.5917	0.307511	1.09924
CF2	Conventional	84	0.91	0.29	5.35294	20.7675	3.9558	34.4144	0.301893	1.05106
CF2	Conventional	84	0.91	0.31	5.05556	18.0702	4.17204	34.7503	0.312546	1.07975
CF2	Conventional	84	1.06	0.3	7.06667	26.1623	5.08909	35.041	0.314661	1.12924
CF2	Conventional	84	1.02	0.3	4.85714	21.6667	3.98667	35.8689	0.295484	1.11807
CF2	Conventional	84	1	0.25	5.26316	19.8465	3.91214	35.3306	0.289849	1.03908
CF2	Conventional	84	0.95	0.24	4.75	15.2851	2.85281	35.3552	0.28619	1.01759
CF2	Conventional	84	1.06	0.29	4.6087	21.0088	3.69754	34.1952	0.279275	1.00972
CF2	Conventional	84	1.03	0.27	5.15	19.8465	3.23339	35.7144	0.293871	1.13073
CF2	Conventional	84	0.85	0.2	4.25	13.443	2.3208	35.2358	0.2854	1.0455
CF2	Conventional	84	1	0.29	5	17.3465	3.31457	36.2337	0.303042	1.14184
CF2	Conventional	84	1	0.25	5	18.8158	3.40265	35.5028	0.290468	1.05744
CF2	Conventional	84	0.93	0.25	4.22727	16.7105	3.30467	35.6386	0.291277	1.07604
CF2	Conventional	84	1	0.31	4.54545	21.0307	3.58784	35.9322	0.301314	1.12702
CF2	Conventional	84	1	0.26	5	18.1798	3.14875	35.5524	0.292095	1.11623
CF2	Conventional	84	0.95	0.25	4.52381	21.557	4.08721	34.6607	0.284685	1.00524
CF2	Conventional	84	1.04	0.27	5.2	21.9298	3.57544	35.7095	0.29743	1.13719
CF2	Conventional	84	0.99	0.26	4.95	21.5132	3.85172	35.8423	0.299424	1.12886
CF2	Conventional	84	0.9	0.24	4.28571	19.364	4.03159	35.5602	0.289203	1.06436
CF2	Conventional	84	0.92	0.26	4.38095	11.7544	2.26013	35.7503	0.295316	1.06276
CF2	Conventional	84	0.97	0.22	4.61905	19.8684	3.80043	35.1844	0.288989	1.0816
CF2	Conventional	84	0.84	0.26	4	14.0351	2.69811	35.7033	0.288705	1.06233
CF2	Conventional	84	0.73	0.27	3.65	10.2412	2.29404	29.2108	0.231508	0.748285
CF2	Conventional	84	0.59	0.21	3.47059	9.10088	2.20423	26.2498	0.210727	0.621941
CF2	Conventional	84	0.53	0.16	3.3125	9.36404	2.04773	24.1377	0.187811	0.550156
CF2	Conventional	84	0.64	0.25	3.76471	11.4791	2.42576	29.725	0.236787	0.740277
CF2	Conventional	84	0.6	0.23	3.33333	7.76316	1.80385	27.6	0.229347	0.617681
CF2	Conventional	84	0.72	0.26	3.6	14.3421	3.33081	30.8415	0.24242	0.753844
CF2	Conventional	84	0.57	0.18	3	7.65934	1.67004	30.1178	0.241357	0.762483
CF2	Conventional	84	0.52	0.18	2.88889	9.94719	2.09886	28.8723	0.233406	0.69404
CF2	Conventional	84	0.57	0.11	1.8	7.76316	1.69268	25.9403	0.207173	0.582987
CF2	Conventional	84	0.8	0.32	3.80952	13.7939	2.29751	33.1929	0.269377	0.951988
CF2	Conventional	84	0.47	0.22	2.76471	7.76316	1.71845	28.5226	0.220037	0.720484
CF2	Conventional	84	0.61	0.26	3.58824	9.1886	1.67453	31.6991	0.24963	0.80668
CF2	Conventional	84	0.86	0.27	4.3	8.57456	1.89566	32.0283	0.262079	0.849235
CF2	Conventional	84	0.64	0.24	3.55556	11.1842	2.11024	31.4216	0.246909	0.802352
CF2	Conventional	84	0.77	0.27	4.05263	12.4123	2.46905	31.2227	0.237609	0.786627
CF2	Conventional	84	0.58	0.18	3.05263	4.62719	1.06018	26.6237	0.202512	0.671543
CF2	Conventional	84	0.74	0.28	3.52381	14.4079	2.81473	32.6355	0.266458	0.903965
CF2	Conventional	84	0.7	0.22	3.68421	12.0395	2.20371	32.8963	0.256954	0.842352
CF3	Conventional	74	0.43	0.18	3.30769	3.64035	0.800004	22.7696	0.188105	0.474179
CF3	Conventional	74	0.56	0.28	3.73333	5.32895	1.07069	23.5897	0.19003	0.529667
CF3	Conventional	74	0.34	0.23	2.42857	3.02632	0.678651	22.6203	0.184297	0.491437
CF3	Conventional	74	0.45	0.2	3.75	4.75877	1.35495	23.9872	0.201604	0.520653
CF3	Conventional	74	0.51	0.29	4.25	5.65789	1.08111	26.2357	0.210431	0.617565
CF3	Conventional	74	0.43	0.21	2.6875	5.8114	1.29534	25.2473	0.206068	0.54072
CF3	Conventional	74	0.57	0.25	4.38462	6.0307	1.52649	25.5742	0.213845	0.598942
CF3	Conventional	74	0.5	0.16	2.77778	4.27632	0.960632	23.5349	0.194859	0.531127
CF3	Conventional	74	0.45	0.24	3	3.79386	0.842996	23.5976	0.193178	0.482792
CF3	Conventional	74	0.6	0.19	4.61538	6.79825	1.92146	26.0518	0.210183	0.652169
CF3	Conventional	74	0.47	0.21	3.35714	3.11404	0.723702	22.9867	0.191392	0.498779
CF3	Conventional	74	0.49	0.25	3.26667	3.79386	0.837988	24.2413	0.202723	0.51028
CF3	Conventional	74	0.4	0.15	3.07692	3.09211	0.667153	23.6624	0.190711	0.526634
CF3	Conventional	74	0.46	0.21	3.53846	3.90351	0.937154	26.0366	0.210542	0.604427
CF3	Conventional	74	0.47	0.24	3.35714	4.16667	0.837	25.171	0.20689	0.540359
CF3	Conventional	74	0.46	0.15	3.28571	2.7193	0.586716	23.2012	0.195528	0.495629
CF3	Conventional	74	0.56	0.2	4.30769	5.13158	1.14968	26.4024	0.207757	0.627665
CF3	Conventional	74	0.44	0.21	3.38462	5.48246	1.46557	26.5291	0.219001	0.594236
CF3	Conventional	74	0.69	0.28	3.45	10.5482	2.51597	29.8265	0.228317	0.811081
CF3	Conventional	74	0.67	0.27	3.94118	8.59649	2.05099	29.1295	0.217782	0.811618
CF3	Conventional	74	0.58	0.28	3.41176	8.07018	2.15635	29.4205	0.227116	0.796407
CF3	Conventional	74	0.85	0.33	5	12.1053	2.44679	29.3594	0.227095	0.841945
CF3	Conventional	74	0.67	0.3	3.52632	8.09211	2.25155	28.6366	0.218141	0.849626
CF3	Conventional	74	0.84	0.32	5.25	13.8816	3.53402	32.0419	0.246703	0.956539
CF3	Conventional	74	0.79	0.31	4.38889	14.7588	4.99024	30.1528	0.229786	0.848557
CF3	Conventional	74	0.53	0.24	3.3125	4.1886	1.02353	26.4909	0.196885	0.735233
CF3	Conventional	74	0.66	0.28	3.88235	7.30263	1.71729	27.8404	0.208983	0.820409
CF3	Conventional	74	0.77	0.3	4.27778	12.1711	2.94157	31.1709	0.238627	0.926107
CF3	Conventional	74	0.53	0.2	3.78571	4.73684	1.17263	23.6965	0.184643	0.635481
CF3	Conventional	74	0.74	0.28	4.35294	6.97368	2.45465	28.4955	0.217484	0.810714
CF3	Conventional	74	0.7	0.3	3.88889	8.75	1.6996	28.9802	0.217446	0.824046
CF3	Conventional	74	0.65	0.26	3.82353	7.45614	1.74414	29.929	0.227771	0.840247
CF3	Conventional	74	0.73	0.3	4.05556	7.67544	1.58604	28.3432	0.217392	0.829141
CF3	Conventional	74	0.63	0.28	3.70588	6.49123	1.21126	26.5443	0.200014	0.72819
CF3	Conventional	74	0.7	0.28	4.11765	9.75877	2.25115	30.3014	0.225621	0.889354
CF3	Conventional	74	0.71	0.29	4.17647	11.0746	2.52721	31.5934	0.250133	0.986263
CF3	Conventional	74	0.7	0.33	5	7.89474	1.90295	28.0661	0.212362	0.789833
CF3	Conventional	74	0.68	0.31	4.85714	6.79825	1.50432	26.7181	0.198153	0.717191
CF3	Conventional	74	0.65	0.31	4.64286	7.01754	1.3906	28.091	0.22033	0.749889
CF3	Conventional	74	0.72	0.35	5.14286	8.35526	1.66838	29.8004	0.226226	0.912749
CF3	Conventional	74	0.68	0.28	4.85714	6.66667	1.4872	27.0113	0.199116	0.77914
CF3	Conventional	74	0.75	0.36	5	8.59649	2.18351	30.5866	0.235862	0.893602
CF3	Conventional	74	0.73	0.26	4.29412	8.02632	1.80732	30.3882	0.236133	0.970256
CF3	Conventional	74	0.69	0.21	4.92857	5.83333	1.1921	27.6629	0.205625	0.759261
CF3	Conventional	74	0.74	0.29	4.93333	9.7807	2.15019	30.3849	0.23374	0.876446
CF3	Conventional	74	0.69	0.25	3.63158	6.0307	1.03849	28.2476	0.213646	0.830244
CF3	Conventional	74	0.58	0.23	3.41176	5.92105	1.76234	23.6163	0.178801	0.633433
CF3	Conventional	74	0.81	0.34	4.76471	12.3246	2.61034	31.6806	0.246051	0.935981
CF3	Conventional	74	0.59	0.26	3.93333	7.12719	1.58509	27.603	0.210863	0.727428
CF3	Conventional	74	0.76	0.29	4.75	8.90351	2.07167	28.2771	0.219541	0.758744
CF3	Conventional	74	0.7	0.23	5	9.07895	1.88624	31.0013	0.237467	0.846282
CF3	Conventional	74	0.29	0.21	1.93333	4.07895	0.912542	24.9408	0.191722	0.61283
CF3	Conventional	74	0.64	0.26	4.26667	5.94298	1.54589	28.3012	0.216395	0.751783
CF3	Conventional	74	0.71	0.26	4.73333	10.2632	1.91935	30.7018	0.234573	0.84724
NF2	Narrow Row	69	0.4	0.14	3.33333	6.40741	1.57648	31.1763	0.239651	0.41716
NF2	Narrow Row	69	0.35	0.15	3.18182	5.96296	1.23381	26.7059	0.192331	0.362739
NF2	Narrow Row	69	0.3	0.1	3	2.33333	0.551787	23.3813	0.172719	0.267038
NF2	Narrow Row	69	0.36	0.14	2.76923	8.55556	1.73815	32.8292	0.263987	0.484386
NF2	Narrow Row	69	0.5	0.2	4.54545	9.62963	3.63076	31.4111	0.252359	0.485814
NF2	Narrow Row	69	0.4	0.13	3.33333	9.51852	2.14309	31.6465	0.243534	0.440612
NF2	Narrow Row	69	0.5	0.15	4.16667	8.66667	1.64077	34.3013	0.287229	0.534056
NF2	Narrow Row	69	0.38	0.1	2.92308	6.92593	2.08664	29.8685	0.232417	0.422282
NF2	Narrow Row	69	0.28	0.09	2.8	7.77778	1.68716	26.3004	0.189767	0.319925
NF2	Narrow Row	69	0.46	0.15	3.53846	9.7037	1.94191	33.5507	0.27038	0.499465
NF2	Narrow Row	69	0.28	0.1	3.5	2.25926	0.526859	24.8476	0.193609	0.294049
NF2	Narrow Row	69	0.33	0.09	3	5.40741	1.20866	26.3038	0.190913	0.324535
NF2	Narrow Row	69	0.29	0.12	2.9	4.74074	1.76526	27.2851	0.195676	0.340364
NF2	Narrow Row	69	0.45	0.1	3.75	8.88889	1.94738	31.1372	0.234391	0.495043
NF2	Narrow Row	69	0.27	0.08	2.7	4.44444	0.912178	26.5886	0.190496	0.30963
NF2	Narrow Row	69	0.29	0.08	2.9	3.25926	0.871265	24.4278	0.187641	0.308486
NF2	Narrow Row	69	0.49	0.14	4.08333	7.37037	1.73587	31.0319	0.235672	0.463093
NF2	Narrow Row	69	0.35	0.11	2.91667	3.88889	1.15578	28.8392	0.21269	0.385799
NF2	Narrow Row	69	0.44	0.14	3.66667	8.92593	2.92699	34.8655	0.268341	0.663364
NF2	Narrow Row	69	0.66	0.18	4.71429	14.1481	3.16522	34.7222	0.27541	0.704625
NF2	Narrow Row	69	0.49	0.12	3.26667	9.25926	3.11704	31.566	0.25269	0.558026
NF2	Narrow Row	69	0.75	0.21	5	13.2222	2.31124	36.6181	0.295892	0.794142
NF2	Narrow Row	69	0.82	0.21	5.125	16.4074	4.02244	37.4864	0.318742	0.935725
NF2	Narrow Row	69	0.8	0.22	5.71429	16.4074	3.16138	38.4743	0.331348	0.855511
NF2	Narrow Row	69	0.74	0.22	5.28571	14.2963	3.18865	37.6762	0.316912	0.909041
NF2	Narrow Row	69	0.69	0.16	5.30769	12.7407	2.9956	35.3406	0.276753	0.766702
NF2	Narrow Row	69	0.58	0.14	4.14286	9.62963	1.98756	34.2404	0.263251	0.617117
NF2	Narrow Row	69	0.7	0.2	5	14.3704	2.76256	36.9599	0.304907	0.810065
NF2	Narrow Row	69	0.52	0.14	4.33333	8.40741	1.78237	32.1141	0.251333	0.611881
NF2	Narrow Row	69	0.69	0.18	4.92857	11.9259	2.67618	36.0855	0.287289	0.699054
NF2	Narrow Row	69	0.45	0.09	4.09091	7.40741	1.67644	33.7151	0.255758	0.672523
NF2	Narrow Row	69	0.84	0.19	6	18.9259	3.66633	37.7044	0.316671	0.853134
NF2	Narrow Row	69	0.44	0.14	4	9	2.13948	33.9877	0.259708	0.620556
NF2	Narrow Row	69	0.33	0.08	3	5.33333	1.03467	31.2254	0.237186	0.561996
NF2	Narrow Row	69	0.52	0.14	4.72727	11.1111	3.076	35.7641	0.287104	0.698462
NF2	Narrow Row	69	0.8	0.2	5.71429	17.2593	3.35382	37.7593	0.317184	0.871324
NF2	Narrow Row	69	0.74	0.26	4.93333	18.5556	4.61291	36.8344	0.313426	0.88413
NF2	Narrow Row	69	0.8	0.27	5.33333	19.2222	4.85436	36.9951	0.323523	0.873952
NF2	Narrow Row	69	0.74	0.28	4.35294	14.5185	4.01066	36.3791	0.314971	0.82695
NF2	Narrow Row	69	0.84	0.26	5.25	23.4074	7.08589	38.151	0.336305	0.983655
NF2	Narrow Row	69	0.91	0.29	5.6875	24.6667	3.82734	38.4599	0.355343	1.06579
NF2	Narrow Row	69	0.83	0.29	4.88235	21.2593	3.25437	38.4871	0.352091	1.04402
NF2	Narrow Row	69	0.85	0.33	5.66667	20.6667	3.16035	38.6147	0.351652	1.02108
NF2	Narrow Row	69	0.83	0.28	5.53333	19.6296	3.47209	37.9455	0.343639	0.987266
NF2	Narrow Row	69	0.8	0.26	5.71429	19.5926	6.19439	37.4417	0.33445	0.899422
NF2	Narrow Row	69	0.9	0.3	6	19.3704	4.17969	38.1971	0.346216	1.04509
NF2	Narrow Row	69	0.72	0.2	5.14286	14.2593	4.5712	37.1323	0.326325	0.817967
NF2	Narrow Row	69	0.8	0.3	5.71429	22	4.97728	38.6174	0.35001	0.971051
NF2	Narrow Row	69	0.84	0.32	5.6	17.8519	2.92913	36.7522	0.318239	0.887722
NF2	Narrow Row	69	1.05	0.29	7.5	25.2222	3.57229	38.4441	0.350498	1.01387
NF2	Narrow Row	69	0.9	0.3	6.42857	22.9259	4.89776	38.1144	0.339375	0.960497
NF2	Narrow Row	69	0.47	0.18	3.91667	10.3704	2.30637	34.5322	0.281872	0.646637
NF2	Narrow Row	69	0.74	0.22	5.28571	19.1852	4.50008	38.8401	0.34262	0.910881
NF2	Narrow Row	69	0.9	0.28	5	17.8889	4.48796	38.5382	0.34452	0.981922
